# Supplementary material for: Microwave-assisted synthesis of silver nanoparticles as a colorimetric sensor for hydrogen peroxide
Source: Royal Society of Chemistry journal article supplement (doi:10.1039/d3ra07775f), 2024-01-01
Supplement: d3ra07775f1.pdf [file d3ra07775f1.pdf]

## Electronic Supplementary Information

### Microwave-Assisted Synthesis of Silver Nanoparticles as Colorimetric Sensor for Hydrogen Peroxide

Nurul Ismillayli,<sup>a,b</sup> Suprpto Suprpto,<sup>a,\*</sup> Eko Santoso,<sup>a</sup> Reva Edra Nugraha,<sup>c</sup> Holilah Holilah,<sup>d</sup> Hasliza Bahruji,<sup>e</sup> Aishah Abdul Jalil,<sup>f,g</sup> Dhony Hermanto,<sup>b</sup> Didik Prasetyoko,<sup>a</sup>

<sup>a</sup>Departement of Chemistry, Faculty of Science and Data Analytics, Institut Teknologi Sepuluh Nopember, Surabaya, 60111, Indonesia

<sup>b</sup>Departement of Chemistry, Faculty of Mathematics and Natural Sciences, University of Mataram, Mataram, Indonesia

<sup>c</sup>Departement of Chemical Engineering, Faculty of Engineering, Universitas Pembangunan Nasioanal "Veteran" Jawa Timur, Surabaya, East Java, 60294

<sup>d</sup>Research Center for Biomass and Bioproducts, National Research and Innovation Agency of Indonesia (BRIN), Cibinong, 16911, Indonesia

<sup>e</sup>Centre of Advanced Material and Energy Sciences, Universiti Brunei Darussalam, Jl. Tungku Link, BE 1410, Brunei

<sup>f</sup>Centre of Hydrogen Energy, Institute of Future Energy, Department of Chemical Engineering, Faculty of Chemical and Energy Engineering Universiti Teknologi Malaysia, 81310 UTM Johor Bahru, Johor, Malaysia.

\*Corresponding author: [suprpto@chem.its.ac.id](mailto:suprpto@chem.its.ac.id)

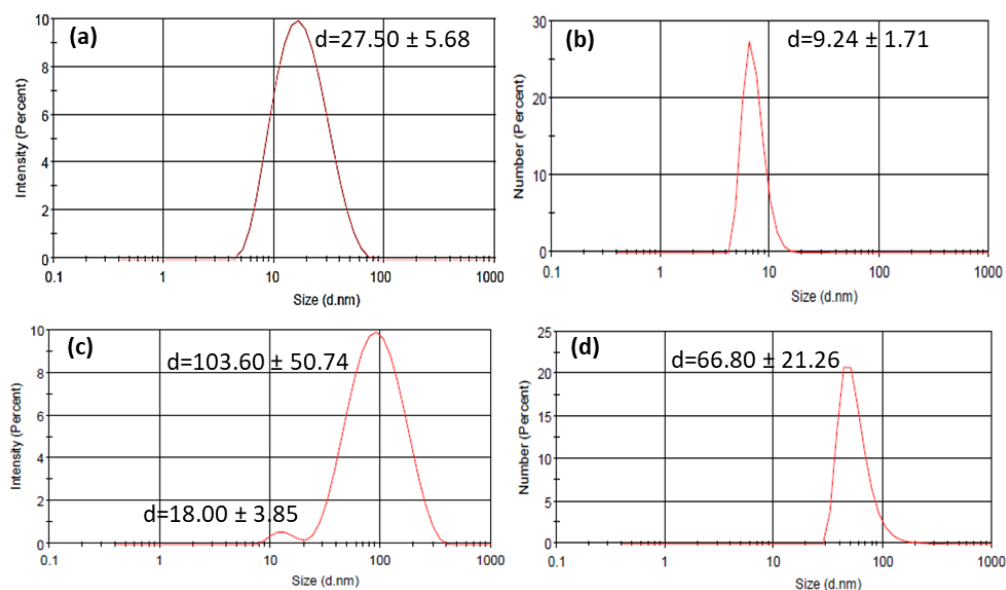

Fig. S1 PSA profile of (a) AgNP1 before and (b) after reaction with  $H_2O_2$ , (c) AgNP2 before and (d) after reaction with  $H_2O_2$

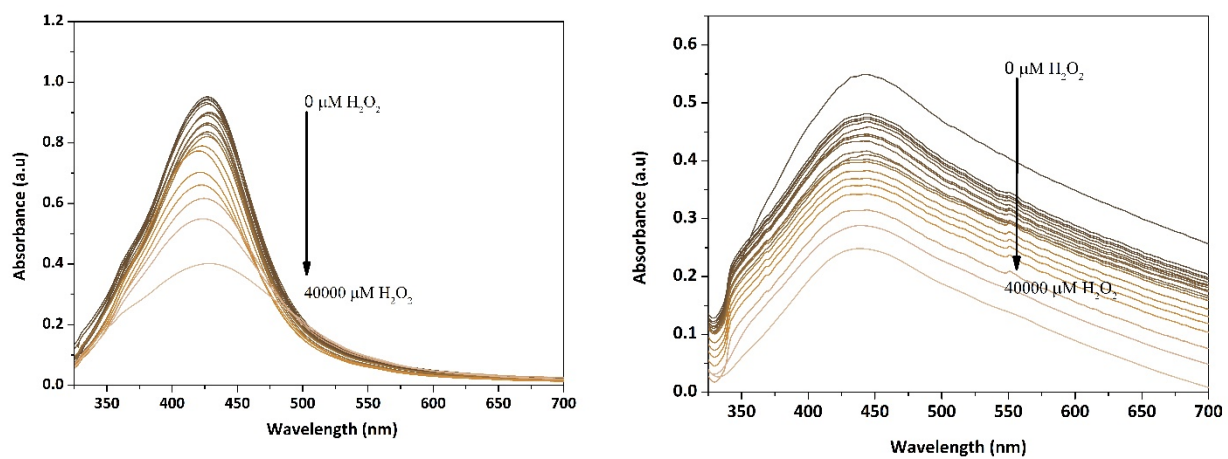

Fig S2. FTIR Spectra of AgNP1 and AgNP2 as respon of increasing the concentration of  $\text{H}_2\text{O}_2$  from 0 to 40000  $\mu\text{M}$

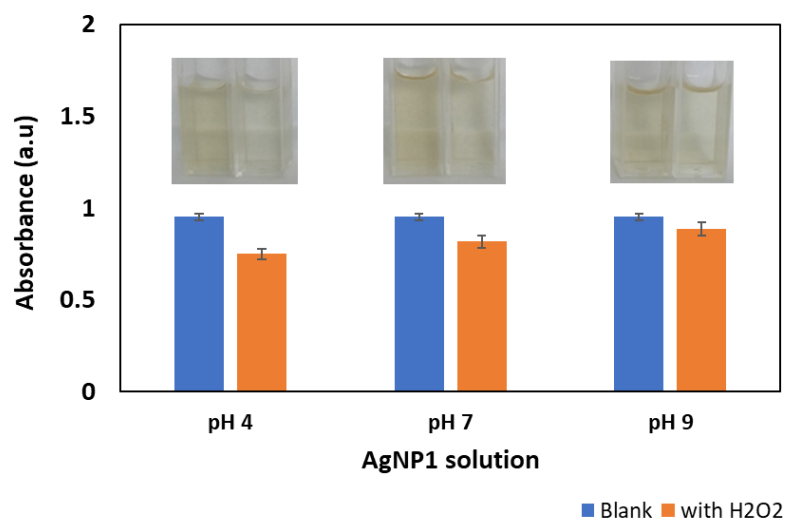

Fig. S3 Effect of pH on  $\text{H}_2\text{O}_2$  detection

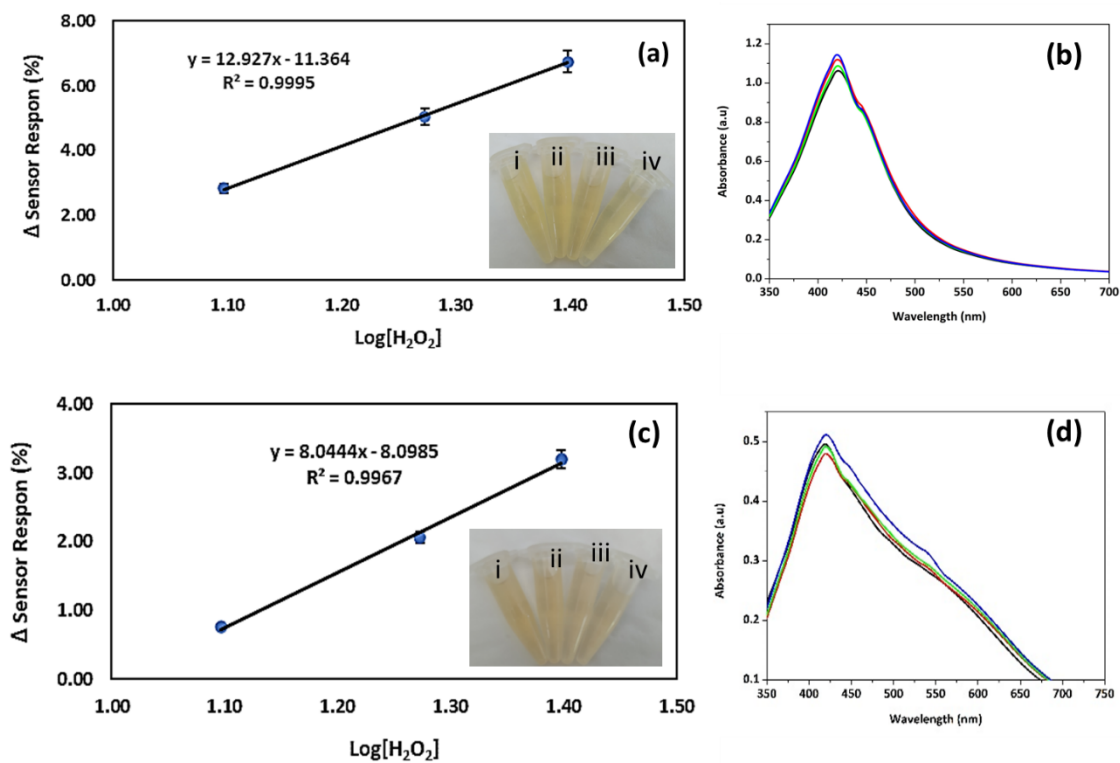

Fig. S4 (a) Calibration curve and (b) Uv-Vis spectra of real sample for  $\text{H}_2\text{O}_2$  determination using AgNP1, (c) calibration curve and (d) Uv-Vis spectra of real sample for  $\text{H}_2\text{O}_2$  determination using AgNP2; inset: color change photograph of sample solutions, (i) initial sample, (ii)-(iv) sample was added with 50, 75 and 100  $\mu\text{M}$ .
